4. Smith NT: The relation between the ultra-low frequency ballistocardiogram, the acceleration pneumocardiogram, and ascending aortic flow acceleration in the baboon. Proc Second World Congress on Ballistocardiography and Cardiovascular Dynamics, Oporto, 1969
5. Cullen BF, Eger EI II, Smith NT, *et al.*: Cardiovascular effects of fluroxene in man. *ANESTHESIOLOGY* 32:218, 1970
6. Bradley EC, Barr JW: Determination of blood volume using indocyanine green (cardio-green) dye. *Life Sci* 7:1001, 1968
7. Eger EI II, Saidman LJ, Brandstater B: Minimum alveolar anesthetic concentration: A standard of anesthetic potency. *ANESTHESIOLOGY* 26:756, 1965
8. Gregory GA, Eger EI II, Munson ES: The relationship between age and halothane requirement in man. *ANESTHESIOLOGY* 30:488, 1969
9. Hornbein TF, Martin WE, Bonica JJ, *et al.*: Nitrous oxide effects on the circulatory and ventilatory responses to halothane. *ANESTHESIOLOGY* 31:250, 1969
10. Smith NT, Corbascio AN: The cardiovascular effects of nitrous oxide during halothane anesthesia in the dog. *ANESTHESIOLOGY* 27:560, 1966
11. Millar RA, Warden JC, Cooperman LH, *et al.*: Central sympathetic discharge and mean arterial pressure during halothane anesthesia. *Brit J Anaesth* 41:918, 1969
12. Smith NT, Eger EI II, Stoelting RK, *et al.*: Cardiovascular effects of halothane in man. Studies during induction and sudden changes in concentration. *JAMA* 206:1495, 1968
13. Gregory GA, Eger EI II, Smith NT, *et al.*: The cardiovascular effects of diethyl ether in man. *ANESTHESIOLOGY* 34:19, 1971
14. Cullen DJ, Eger EI II, Gregory GA: The cardiovascular effects of cyclopropane in man. *ANESTHESIOLOGY* 31:398, 1969
15. Price HL, Skovsted P, Pauca AL, *et al.*: Evidence for  $\beta$ -receptor activation produced by halothane in normal man. *ANESTHESIOLOGY* 32:369, 1970

---

### Blood Transfusion

**COMMERCIAL BLOODBANKING** There is no national blood donor program in the U. S. The American Red Cross collects about half, community and hospital banks about a fourth, and commercial banks the remaining fourth of the blood dispensed. Commercial banks pay \$4 to \$10 per pint to prisoners, hippies, addicts, and Skid Row residents, and this blood is the source of 90 per cent of the cases of serum hepatitis. The hepatitis rate following transfusion is 0.3 per cent for volunteer donors, 3.0 per cent for commercial donors. Tests for the Australia antigen can detect less than half of the blood capable of causing hepatitis. Because commercial donors sell blood cheaply, less effort is made to recruit volunteers; the commercial blood banks are increasing their share of the 7,000,000-unit annual need. Statistics regarding blood use and results are unreliable because banks that operate within state boundaries are not subject to Federal inspection. Blood from commercial sources should be labeled "high-risk" and avoided, if possible. (*Allen, J. G.: Commercial Blood in Our National Blood Program, Arch. Surg. 102: 122-126, 1971.*)
